# Supplementary material
Source: ML conference proceedings conference paper supplement (https://proceedings.mlr.press/v130/guo21c.html)
Supplement: Supplementary file 1 [file guo21c-supp.pdf]

## A ADDITIONAL PRELIMINARIES

**Concatenation.** We denote the concatenation of paths by  $\oplus$ , so that for a path  $p = \langle V_1, V_2, \dots, V_m \rangle$ ,  $p = p(V_1, V_r) \oplus p(V_r, V_m)$ , for  $1 \leq r \leq m$ .

**Probabilistic implications of d-separation.** Let  $f$  be any observational density over  $X$  consistent with an MPDAG  $\mathcal{G} = (V, E, U)$ . Let  $A, Y$  and  $Z$  be pairwise disjoint node sets in  $V$ . If  $A$  and  $Y$  are d-separated given  $Z$  in  $\mathcal{G}$ , then  $X_A$  and  $X_Y$  are conditionally independent given  $X_Z$  in the observational density  $f$  (Lauritzen et al., 1990; Pearl, 2009). Hence, all DAGs that encode the same d-separation relationships also encode the same conditional independences and are therefore *Markov equivalent*.

**Buckets and bucket decomposition (Perković, 2020).** A node set  $A$ ,  $A \subseteq V$  is an *undirected connected set* in  $\mathcal{G} = (V, E, U)$  if for every two distinct nodes  $A_i, A_j \in A$ ,  $A_i - \dots - A_j$  is in  $\mathcal{G}$ . If node set  $B$ ,  $B \subseteq D \subseteq V$ , is a maximal undirected connected subset of  $D$  in  $\mathcal{G} = (V, E, U)$ , we call  $B$  a *bucket* in  $D$ . Additionally,  $D$  can be partitioned into  $D = D_1 \cup \dots \cup D_K$ , where each  $D_k$ ,  $k \in \{1, \dots, K\}$  is a bucket in  $D$  and  $D_i \cap D_j = \emptyset$  for  $i \neq j$ . We call the above partitioning of  $D$  into buckets *the bucket decomposition*. Furthermore,  $D_1, \dots, D_K$  can be ordered in such a way that if  $D_1 \rightarrow D_2$  and  $D_1 \in D_i$ ,  $D_2 \in D_j$ , then  $i < j$ ; see PCO algorithm of Perković (2020).

**Lemma A.1** (Rules of the do-calculus, Pearl, 2009). Let  $A, Y, Z$  and  $W$  be pairwise disjoint (possibly empty) node sets in causal DAG  $\mathcal{D} = (V, E, \emptyset)$ . Let  $\mathcal{D}_{\overline{A}}$  denote the graph obtained by deleting all edges into  $A$  from  $\mathcal{D}$ . Similarly, let  $\mathcal{D}_{\underline{A}}$  denote the graph obtained by deleting all edges out of  $A$  in  $\mathcal{D}$  and let  $\mathcal{D}_{\overline{AZ}}$  denote the graph obtained by deleting all edges into  $A$  and all edges out of  $Z$  in  $\mathcal{D}$ .

**Rule 1.** If  $Y \perp_{\mathcal{D}_{\overline{A}}} Z | A \cup W$ , then  $f(x_y | \text{do}(x_a), x_w) = f(x_y | \text{do}(x_a), x_z, x_w)$ .

**Rule 2.** If  $Y \perp_{\mathcal{D}_{\overline{AZ}}} Z | A \cup W$ , then  $f(x_y | \text{do}(x_a), \text{do}(x_z), x_w) = f(x_y | \text{do}(x_a), x_z, x_w)$ .

**Rule 3.** If  $Y \perp_{\mathcal{D}_{\overline{AZ(W)}}} Z | A \cup W$ , then  $f(x_y | \text{do}(x_a), x_w) = f(x_y | \text{do}(x_a), x_z, x_w)$ , where  $Z(W) = Z \setminus \text{An}(W, \mathcal{D}_{\overline{A}})$ .

**Lemma A.2** (Lemma 3.6 of Perković et al., 2017). Let  $A$  and  $Y$  be distinct nodes in a MPDAG  $\mathcal{G}$ . If  $p$  is a possibly causal path from  $A$  to  $Y$  in  $\mathcal{G}$ , then a subsequence  $p^*$  of  $p$  forms a possibly causal unshielded path from  $A$  to  $Y$  in  $\mathcal{G}$ .

**Lemma A.3** (Wright’s rule, Wright, 1921). Let  $X = AX + \varepsilon$ , where  $A \in \mathbb{R}^{p \times p}$ ,  $X = X_V$ ,  $|V| = p$ , and  $\varepsilon = (\varepsilon_1, \dots, \varepsilon_p)^T$  is a vector of mutually inde-

pendent errors with means zero and proper variance such that  $\text{var}(X_i) = 1$ , for all  $i \in \{1, \dots, p\}$ . Let  $\mathcal{D} = (V, E, \emptyset)$ , be the corresponding DAG For two distinct nodes  $i, j \in V$ , let  $p_1, \dots, p_k$  be all paths between  $i$  and  $j$  in  $\mathcal{D}$  that do not contain a collider. Then  $\text{cov}(X_i, X_j) = \sum_{r=1}^k \pi_r$ , where  $\pi_r$  is the product of all edge coefficients along path  $p_r$ ,  $r \in \{1, \dots, k\}$ .

**Lemma A.4.** (See, e.g., Mardia et al., 1980, Theorem 3.2.4) Let  $X = (X_1, X_2)$  be a  $p$ -dimensional multivariate Gaussian random vector with mean vector  $\mu = (\mu_1, \mu_2)$  and covariance matrix  $\Sigma = \begin{bmatrix} \Sigma_{11} & \Sigma_{12} \\ \Sigma_{21} & \Sigma_{22} \end{bmatrix}$ , so that  $X_1$  is a  $q$ -dimensional multivariate Gaussian random vector with mean vector  $\mu_1$  and covariance matrix  $\Sigma_{11}$  and  $X_2$  is a  $(p - q)$ -dimensional multivariate Gaussian random vector with mean vector  $\mu_2$  and covariance matrix  $\Sigma_{22}$ . Then  $\mathbb{E}[X_2 | X_1 = x_1] = \mu_2 + \Sigma_{21} \Sigma_{11}^{-1} (x_1 - \mu_1)$ .

---

**Algorithm 1:** MPDAG (see also Meek, 1995 and Algorithm 1 of Perković et al., 2017)

---

**input** : MPDAG  $\mathcal{G}$ , set of background knowledge edge orientations  $R$ .

**output:** MPDAG  $\mathcal{G}'$  or FAIL.

```

1 Let  $\mathcal{G}' = \mathcal{G}$ ;
2 while  $R \neq \emptyset$  do
3   Choose an edge  $\{U \rightarrow V\}$  in  $R$ ;
4    $R = R \setminus \{U \rightarrow V\}$ ;
5   if  $\{U - V\}$  or  $\{U \rightarrow V\}$  is in  $\mathcal{G}'$  then
6     Orient  $\{U \rightarrow V\}$  in  $\mathcal{G}'$ ;
7     Iterate the rules in Figure 3 of the main
      text until no more can be applied;
8   else
9     FAIL;
10  end
11 end
12 return  $\mathcal{G}'$ ;
```

---

## B PROOFS OF MAIN RESULTS

**Proof of Theorem 2.** Let  $p = \langle A_1, V_1, \dots, V_k = Y_1 \rangle$ ,  $k \geq 1$ ,  $A_1 \in A$ ,  $Y_1 \in Y$ . If  $k = 1$ , that is,  $A_1 - Y_1$  is in  $\mathcal{G}$ , the proposition clearly holds. Hence, we will assume  $k > 1$ . Suppose for a contradiction that there is an MPDAG  $\mathcal{G}^*$  represented by  $\mathcal{G}$  such that  $A_1 - V_1$  is in  $\mathcal{G}^*$  and that the total effect of  $A$  on  $Y$  is identified in  $\mathcal{G}^*$ . Further, let  $p^*$  be the path in  $\mathcal{G}^*$  that corresponds to path  $p$  in  $\mathcal{G}$ , so that  $p$  and  $p^*$  are both sequences of nodes  $\langle A_1, V_1, \dots, V_k = Y_1 \rangle$ ,  $k > 1$ .

Since the total effect of  $A$  on  $Y$  is identified in  $\mathcal{G}^*$ , and because  $p^*$  is a proper path from  $A$  to  $Y$  that starts with an undirected edge in  $\mathcal{G}^*$ , by Theorem 1,  $p^*$  must

be a non-causal path from  $A_1$  to  $Y_1$  in  $\mathcal{G}^*$ . We show that this implies that  $A_1 - V_1 \leftarrow V_2$  and  $A_1 \rightarrow V_2$  are in  $\mathcal{G}^*$ , which contradicts that  $\mathcal{G}^*$  is an MPDAG (because orientations in  $\mathcal{G}^*$  are not complete with respect to R2 in Figure 3 of main text).

We first show that any existing edge between  $A_1$  and  $V_i$ ,  $i \in \{2, \dots, k\}$  in  $\mathcal{G}$  is of the form  $A_1 \rightarrow V_i$ . Suppose that there is an edge between  $A_1$  and  $V_i$ , in  $\mathcal{G}$ . This edge is cannot be of the form  $A_1 \leftarrow V_i$ , since that would imply that  $p$  is a non-causal path in  $\mathcal{G}$ . This edge also cannot be of the form  $A_1 - V_i$ , because otherwise we can concatenate  $A_1 - V_i$  and  $p(V_i, Y_1)$  to construct a proper possibly causal path from  $A$  to  $Y$  in  $\mathcal{G}$  that is shorter than  $p$ . Hence, any existing edge between  $A_1$  and  $V_i$  must be of the form  $A_1 \rightarrow V_i$  in  $\mathcal{G}$  and  $\mathcal{G}^*$ .

Next, we show that  $p^*(V_1, Y_1)$  starts with edge  $V_1 \leftarrow V_2$  in  $\mathcal{G}$ . Since  $p$  is chosen as a shortest proper possibly causal path from  $A$  to  $Y$  that starts with an undirected edge in  $\mathcal{G}$ ,  $p(V_1, Y_1)$  is a proper possibly causal definite status path in  $\mathcal{G}$  (Lemma A.2). Then  $p^*(V_1, Y_1)$  is also a path of definite status in  $\mathcal{G}^*$ . Additionally, since  $p(V_1, Y_1)$  is a possibly causal definite status path in  $\mathcal{G}$ , there cannot be any collider on  $p^*(V_1, Y_1)$ .

Furthermore,  $p^*$  is a non-causal path,  $A_1 - V_1$  is in  $\mathcal{G}^*$ , and any edge between  $A_1$  and  $V_i$ ,  $i \in \{2, \dots, k\}$  is of the form  $A_1 \rightarrow V_i$ , so  $p^*(V_1, Y_1)$  must be a non-causal path from  $V_1$  to  $Y$ . Since  $p^*(V_1, Y_1)$  is a non-causal definite status path without any colliders, it must start with an edge into  $V_1$ , that is  $V_1 \leftarrow V_2$  is on  $p^*(V_1, Y_1)$  in  $\mathcal{G}^*$ . Then  $A_1 - V_1 \leftarrow V_2$  is in  $\mathcal{G}^*$ .

Now,  $p^*(A_1, V_2)$  is of the form  $A_1 - V_1 \leftarrow V_2$ , so for  $\mathcal{G}^*$  to be an MPDAG,  $\langle A_1, V_2 \rangle$  is in  $\mathcal{G}^*$  (R1 in Figure 3). Then  $A_1 \rightarrow V_2 \rightarrow V_1$  and  $A_1 - V_1$  are in  $\mathcal{G}^*$ , which by R2 in Figure 3 contradicts that  $\mathcal{G}^*$  is an MPDAG.  $\square$

**Proof of Theorem 3.** Statement (iii) directly follows from the construction of the algorithm. Statement (i) follows from the construction of the algorithm and Theorem 1.

Now we prove statement (ii). The proof follows a similar reasoning as the proof of Theorem 2 of Shpitser and Pearl (2006), proof of Theorem 57 of Perković et al. (2018) and proof of Proposition 3.2. of Perković (2020).

Suppose for a contradiction that  $|L| \geq 2$  and let  $\mathcal{G}_1$  and  $\mathcal{G}_2$  be two different MPDAGs in  $L$ . Since  $\mathcal{G}_1$  and  $\mathcal{G}_2$  are both represented by  $\mathcal{G}$ , any observational density  $f$  consistent with  $\mathcal{G}$  is also consistent with  $\mathcal{G}_1$  and  $\mathcal{G}_2$  due to Markov equivalence.

Let  $[\mathcal{G}]$  denote the set of DAGs represented by  $\mathcal{G}$ . Let  $f_1(x_Y | \text{do}(x_A))$  denote the density of  $X_Y$  under the intervention  $\text{do}(X_A = x_A)$  computed from  $f(x)$  as-

suming that the causal DAG belongs to  $[\mathcal{G}_1]$ . Analogously, let  $f_2(x_Y | \text{do}(x_A))$  denote the density of  $X_Y$  under the intervention  $\text{do}(X_A = x_A)$  computed from  $f(x)$  assuming that the causal DAG belongs to  $[\mathcal{G}_2]$ . For the above interventional densities of  $X_Y$  to differ, it suffices to show that  $\mathbb{E}_1[X_Y | \text{do}(X_A = \mathbf{1})] \neq \mathbb{E}_2[X_Y | \text{do}(X_A = \mathbf{1})]$ , where  $\text{do}(X_A = \mathbf{1})$  indicates a do intervention that sets the value of every variable indexed by  $A$  to 1, and  $\mathbb{E}_1$  and  $\mathbb{E}_2$  correspond to  $f_1$  and  $f_2$  respectively. Furthermore, it suffices to show that there is a node  $Y_1 \in Y$  such that  $\mathbb{E}_1[X_{Y_1} | \text{do}(X_A = \mathbf{1})] \neq \mathbb{E}_2[X_{Y_1} | \text{do}(X_A = \mathbf{1})]$ .

The stages of this proof are as follows. First, we will establish some graphical differences between  $\mathcal{G}_1$  and  $\mathcal{G}_2$  that stem from the application of Theorem 2 in the IDGraphs algorithm (Algorithm 1 in the main text). These graphical differences will be categorized as cases (i) and (ii) in Lemma B.1 below. Then, for each case, we will construct a linear causal model with Gaussian noise that imposes an observational density  $f(x)$  consistent with  $\mathcal{G}_1$  and  $\mathcal{G}_2$  such that  $\mathbb{E}_1[X_{Y_1} | \text{do}(X_A = \mathbf{1})] \neq \mathbb{E}_2[X_{Y_1} | \text{do}(X_A = \mathbf{1})]$ , which gives us the desired contradiction.

First, we establish the pertinent graphical differences between  $\mathcal{G}_1$  and  $\mathcal{G}_2$ . For this purpose, let  $R_1$  and  $R_2$  be the list of edge orientations that were added to  $\mathcal{G}$  to construct  $\mathcal{G}_1$  and  $\mathcal{G}_2$  by the IDGraphs algorithm. That is  $\mathcal{G}_1 = \text{MPDAG}(\mathcal{G}, R_1)$  and  $\mathcal{G}_2 = \text{MPDAG}(\mathcal{G}, R_2)$ . Without loss of generality, suppose that the edge orientations in  $R_1$  and  $R_2$  are listed in the order that they were added by the IDGraphs algorithm.

By construction of  $R_1$  and  $R_2$ , there is at least one edge whose orientation differs between  $R_1$  and  $R_2$ . Without loss of generality, let  $A_1 \rightarrow V_1$ ,  $A_1 \in A$ ,  $V_1 \in V \setminus A$  be the first edge in  $R_1$  such that  $A_1 \leftarrow V_1$  is in  $R_2$ . Also, let  $R^*$  be the list of edge orientations that come before  $A_1 \rightarrow V_1$  in  $R_1$  and let  $\mathcal{G}^* = \text{MPDAG}(\mathcal{G}, R^*)$ . Then by Theorem 2, the total effect of  $A$  on  $Y$  is not identified given  $\mathcal{G}^*$ .

Among all the shortest proper possibly causal paths from  $A$  to  $Y$  that start with an undirected edge in  $\mathcal{G}^*$ , choose  $p^*$  as one that starts with  $A_1 - V_1$ ,  $p^* = \langle A_1 = V_0, V_1, \dots, V_k = Y_1 \rangle$ ,  $Y_1 \in Y$ . Let  $p_1$  be the path in a DAG  $\mathcal{D}_1$  in  $[\mathcal{G}_1]$  that consists of the same sequence of nodes as  $p^*$  in  $\mathcal{G}^*$ . Analogously, let  $p_2$  be the path in a DAG  $\mathcal{D}_2$  in  $[\mathcal{G}_2]$  that consists of the same sequence of nodes as  $p^*$ .

By Lemma B.1 we have the following cases:

- (i) if  $p^*$  is unshielded in  $\mathcal{G}^*$ , then  $p_1$  is of the form  $A_1 \rightarrow V_1 \rightarrow \dots \rightarrow Y_1$ , and  $p_2$  starts with edge  $A_1 \leftarrow V_1$ .
- (ii) if  $p^*$  is a shielded path in  $\mathcal{G}^*$ , then  $A_1 \rightarrow V_i$ ,  $i \in$

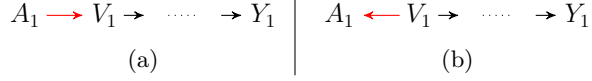

Figure B.1: DAGs (a)  $\mathcal{D}_{11}$  and (b)  $\mathcal{D}_{21}$  corresponding to (i) in the Proof of Theorem 3.

$\{1, \dots, r\}$ ,  $2 \leq r \leq k$ , is in  $\mathcal{G}^*$ ,  $p_2$  is of the form  $A_1 \leftarrow V_1 \rightarrow \dots \rightarrow V_r \rightarrow \dots \rightarrow Y_1$ , and

- (a)  $p_1$  is of the form  $A_1 \rightarrow V_1 \rightarrow \dots \rightarrow V_r \rightarrow \dots \rightarrow Y_1$ , or
- (b)  $p_1$  is of the form  $A_1 \rightarrow V_1 \leftarrow \dots \leftarrow V_l \rightarrow \dots \rightarrow Y_1$ ,  $2 \leq l \leq r$ .

We will now show how to choose a linear causal model consistent with  $\mathcal{G}_1$  and  $\mathcal{G}_2$  in each of the above cases that results in  $\mathbb{E}_1[X_{Y_1} | \text{do}(X_A = x_A)] \neq \mathbb{E}_2[X_{Y_1} | \text{do}(X_A = x_A)]$ .

(i) Consider a multivariate Gaussian density over  $X$  with mean zero, constructed using a linear causal model with Gaussian noise consistent with  $\mathcal{D}_1$  and thus, also  $\mathcal{G}_1$  (due to Markov equivalence). We define the linear causal model in such a way that all edge coefficients except for the ones on  $p_1$  are 0, and all edge coefficients on  $p_1$  are in  $(0, 1)$  and small enough so that we can choose the error variances in such a way that  $\text{var}(X_i) = 1$  for every  $i \in V$ .

The density  $f(x)$  generated in this way is consistent with  $\mathcal{D}_1$  and thus also consistent with  $\mathcal{G}_1$  and  $\mathcal{G}_2$  (Lauritzen et al., 1990). Moreover,  $f(x)$  is consistent with DAG  $\mathcal{D}_{11}$  that is obtained from  $\mathcal{D}_1$  by removing all edges except for the ones on  $p_1$ ; see Figure B.1(a). Additionally,  $\mathcal{D}_{11}$  is Markov equivalent to DAG  $\mathcal{D}_{21}$ , which is obtained from  $\mathcal{D}_2$  by removing all edges except for those on  $p_2$ ; see Figure B.1(b). Hence,  $f(x)$  is also consistent with  $\mathcal{D}_{21}$ .

Let  $f_1(x_{Y_1} | \text{do}(x_A))$  be an interventional density of  $X_{Y_1}$  under the intervention  $\text{do}(X_A = x_A)$  that is consistent with  $\mathcal{D}_{11}$  (and  $\mathcal{D}_1$ ). By Rules 3 and 2 of the do-calculus (Lemma A.1), we have

$$f_1(x_Y | \text{do}(x_A)) = f_1(x_Y | \text{do}(x_{A_1})) = f(x_Y | x_{A_1}).$$

So  $\mathbb{E}_1[X_{Y_1} | \text{do}(X_A = \mathbf{1})] = \int x_{Y_1} f(x_Y | X_{A_1} = \mathbf{1}) dx_{Y_1} = \text{cov}(X_{Y_1}, X_{A_1}) = a$  by Lemma A.4. Additionally, by Lemma A.3,  $a$  is equal to the product of all edge coefficients along  $p_1$  and so  $a \in (0, 1)$ .

Similarly, let  $f_2(x_{Y_1} | \text{do}(x_A))$  be an interventional density of  $X_{Y_1}$  consistent with  $\mathcal{D}_{21}$  (and  $\mathcal{D}_2$ ). Then  $f_2(x_{Y_1} | \text{do}(x_A)) = f(x_{Y_1})$  by Rule 3 of Lemma A.1. Hence,  $\mathbb{E}_2[X_{Y_1} | \text{do}(X_A = \mathbf{1})] = \mathbb{E}[X_{Y_1}] = 0$ . Since  $a \neq 0$ , this completes the proof for case (i).

(ii) Consider a multivariate Gaussian density over  $X$  with mean zero, constructed using a linear causal

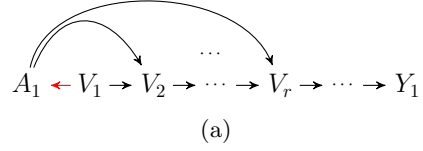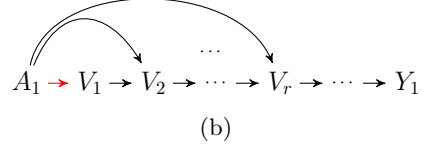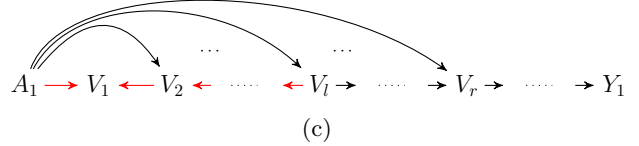

Figure B.2: DAGs (a)  $\mathcal{D}_{22}$ , (b)  $\mathcal{D}_{11}$ , and (c)  $\mathcal{D}_{12}$  corresponding to (ii)a and (ii)b in the proof of Theorem 3.

model with Gaussian noise consistent with  $\mathcal{D}_2$ . We define the causal model in a way such that all edge coefficients except for the ones on  $p_2$  and  $A_1 \rightarrow V_i$ ,  $i \in \{2, \dots, r\}$  are 0, and all edge coefficients on  $p_2$  and  $A_1 \rightarrow V_i$  are in  $(0, 1)$  and small enough so in such a way that  $\text{var}(X_i) = 1$  for all  $i \in V$ .

The density  $f(x)$  generated in this way is consistent with  $\mathcal{D}_2$  and  $\mathcal{G}_2$  (Lauritzen et al., 1990). Moreover,  $f(x)$  is consistent with DAG  $\mathcal{D}_{22}$  that is obtained from  $\mathcal{D}_2$  by removing all edges except for the ones on  $p_2$  and  $A_1 \rightarrow V_i$ ,  $i \in \{2, \dots, r\}$ ,  $2 \leq r \leq k$ ; see Fig. B.2(a). Let  $f_2(x_{Y_1} | \text{do}(x_A))$  be an interventional density of  $X_{Y_1}$  under the intervention  $\text{do}(X_A = x_A)$  that is consistent with  $\mathcal{D}_{22}$  (and also  $\mathcal{D}_2$ ).

We now have

$$\begin{aligned}
& f_2(x_{Y_1} | \text{do}(x_A)) \\
&= f_2(x_{Y_1} | \text{do}(x_{A_1})) \\
&= \int f(x_{Y_1} | \text{do}(x_{A_1}), x_{V_1}) f(x_{V_1} | \text{do}(x_{A_1})) dx_{V_1} \quad (1) \\
&= \int f(x_{Y_1} | x_{A_1}, x_{V_1}) f(x_{V_1}) dx_{V_1}.
\end{aligned}$$

The first line follows using Rule 3 of the do-calculus, and the third line follows from an application of Rule 2 and Rule 3; see Lemma A.1.

We now compute  $\mathbb{E}_2[X_{Y_1} | \text{do}(X_A = \mathbf{1})]$ . For simplicity, we will use shorthands  $\text{cov}(X_{Y_1}, X_{A_1}) = a$ ,  $\text{cov}(X_{Y_1}, X_{V_1}) = b$  and  $\text{cov}(X_{A_1}, X_{V_1}) = c$ . Now, us-

ing Lemma A.4 and Eq. (1), we have

$$\begin{aligned}
& \mathbb{E}_2[X_{Y_1} | \text{do}(X_A = 1)] \\
&= \int \mathbb{E}[X_{Y_1} | X_{A_1} = 1, X_{V_1} = x_{V_1}] f(x_{V_1}) dx_{V_1} \\
&= \int [a \ b] \begin{bmatrix} 1 & c \\ c & 1 \end{bmatrix}^{-1} \begin{bmatrix} 1 \\ x_{V_1} \end{bmatrix} f(x_{V_1}) dx_{V_1} \\
&= \int \frac{1}{1-c^2} [a \ b] \begin{bmatrix} 1 & -c \\ -c & 1 \end{bmatrix} \begin{bmatrix} 1 \\ x_{V_1} \end{bmatrix} f(x_{V_1}) dx_{V_1} \\
&= \frac{a-bc}{1-c^2} + \frac{-ac+b}{1-c^2} \mathbb{E}[X_{V_1}] = \frac{a-bc}{1-c^2}.
\end{aligned}$$

Now, consider the cases (ii)a and (ii)b. Note that  $f(x)$  is also consistent with  $\mathcal{D}_1$ ,  $\mathcal{G}_1$  and a DAG that is obtained from  $\mathcal{D}_1$  by removing all edges except for the ones on  $p_1$  and  $A_1 \rightarrow V_i$ ,  $i \in \{2, \dots, r\}$  (Lauritzen et al., 1990). Depending on case (ii)a or (ii)b, this will be either DAG  $\mathcal{D}_{11}$  in Figure B.2(b) or DAG  $\mathcal{D}_{12}$  in Figure B.2(c).

Let  $f_{11}(x_{Y_1} | \text{do}(x_A))$  and  $f_{12}(x_{Y_1} | \text{do}(x_A))$  be the interventional densities of  $X_{Y_1}$  that are consistent with  $\mathcal{D}_{11}$  and  $\mathcal{D}_{12}$ , respectively. Note that  $f_{11}(x_{Y_1} | \text{do}(x_A)) = f_{12}(x_{Y_1} | \text{do}(x_A))$  since

$$\begin{aligned}
& f_{11}(x_{Y_1} | \text{do}(x_A)) \\
&= f_{11}(x_{Y_1} | \text{do}(x_{A_1})) \\
&= f(x_{Y_1} | x_{A_1}) \\
&= f(x_{Y_1} | x_A) = f_{12}(x_{Y_1} | \text{do}(x_A)).
\end{aligned} \tag{2}$$

The first two equalities above follow from Rule 3 and Rule 2 of the do-calculus, while the third and fourth follow from Rule 1 and Rule 2; see again Lemma A.1. Hence,  $f_1(x_{Y_1} | \text{do}(x_A)) = f_{11}(x_{Y_1} | \text{do}(x_A)) = f_{12}(x_{Y_1} | \text{do}(x_A))$ .

Using Equation (2) and Lemma A.4, we have  $\mathbb{E}_1[X_{Y_1} | \text{do}(X_A = \mathbf{1})] = \mathbb{E}[X_{Y_1} | X_{A_1} = \mathbf{1}] = \text{cov}(X_{Y_1}, X_{A_1}) = a$ . To show that  $\mathbb{E}_1[X_{Y_1} | \text{do}(X_A = \mathbf{1})] \neq \mathbb{E}_2[X_{Y_1} | \text{do}(X_A = 1)]$ , we need only to show that  $a \neq (a-bc)/(1-c^2)$ .

We will show that  $b > ac$  and  $c > 0$ , which leads to  $a-bc < a-ac^2$ , that is  $(a-bc)/(1-c^2) < a$ . To show  $b > ac$  and  $c > 0$ , we need to discuss  $a, b$  and  $c$  in terms of the original linear causal model.

By Lemma A.3, we have that  $c = \text{cov}(X_{A_1}, X_{V_1})$  is equal the edge coefficient assigned to  $A_1 \leftarrow V_1$  in  $\mathcal{D}_{21}$ , and hence  $c \in (0, 1)$ . Let  $a_1$  be the product of edge coefficients on  $p_2(V_1, Y_1)$  and let  $a_i$  be the product of edge coefficients along  $\langle A_1, V_i \rangle \oplus p_2(V_i, Y_1)$ ,  $i \in \{2, \dots, r\}$ . Then  $a_i \in (0, 1)$  for all  $i \in \{1, \dots, r\}$ . By Lemma A.3, we now have

$$\begin{aligned}
a &= \text{cov}(X_{Y_1}, X_{A_1}) = c \cdot a_1 + a_2 + \dots + a_r, \\
b &= \text{cov}(X_{Y_1}, X_{V_1}) = a_1 + c \cdot (a_2 + \dots + a_r),
\end{aligned}$$

which yields  $b-ac = a_1(1-c^2) > 0$ , completing the proof.  $\square$

**Lemma B.1.** Suppose that the total effect of  $A$  on  $Y$  is not identified given MPDAG  $\mathcal{G}$ . Let  $p = \langle A_1 = V_0, V_1, \dots, V_k = Y_1 \rangle$ ,  $k \geq 1$ ,  $A_1 \in A$ ,  $Y_1 \in Y$ , be a shortest proper possibly causal path from  $A$  to  $Y$  in  $\mathcal{G}$ . Let  $\mathcal{G}_1 = \text{MPDAG}(\mathcal{G}, \{A_1 \rightarrow V_1\})$  and  $\mathcal{G}_2 = \text{MPDAG}(\mathcal{G}, \{A_1 \leftarrow V_1\})$ . Let  $p_1$  and  $p_2$  be the paths in  $\mathcal{G}_1$  and  $\mathcal{G}_2$  respectively, that consist of the same sequence of nodes as  $p$  in  $\mathcal{G}$ .

(i) If  $p$  is an unshielded path in  $\mathcal{G}$ , then

- $p_1$  is of the form  $A_1 \rightarrow V_1 \rightarrow \dots \rightarrow Y_1$ , and
- $p_2$  is of the form  $A_1 \leftarrow V_1 \dots Y_1$ .

(ii) If  $p$  is a shielded path in  $\mathcal{G}$ , then

- $A_1 \rightarrow V_i$  is in  $\mathcal{G}$  for all  $i \in \{2, \dots, r\}$ ,  $r \leq k$ ,  $k > 1$ ,
- $p_2$  is of the form  $A_1 \leftarrow V_1 \rightarrow \dots \rightarrow Y$ ,
- Let  $\mathcal{D}_1$  be a DAG in  $[\mathcal{G}_1]$  and let  $p_{11}$  be the path in  $\mathcal{D}_1$  corresponding to  $p_1$  in  $\mathcal{G}_1$  and to  $p$  in  $\mathcal{G}$ , then
  - (a)  $p_{11}$  is of the form  $A_1 \rightarrow V_1 \rightarrow \dots \rightarrow Y_1$  in  $\mathcal{D}_1$ , or
  - (b)  $p_{11}$  is of the form  $A_1 \rightarrow V_1 \leftarrow \dots \leftarrow V_l \rightarrow \dots \rightarrow Y_1$ ,  $1 < l \leq r$  in  $\mathcal{D}_1$ .

**Proof of Lemma B.1.** Path  $p$  is chosen as a shortest proper possibly causal path from  $A$  to  $Y$  that starts with an undirected edge in  $\mathcal{G}$ . Hence,  $p(V_1, Y_1)$  must be an unshielded possibly causal path from  $V_1$  to  $Y_1$ , otherwise we can choose a shorter path than  $p$  in  $\mathcal{G}$ . This implies that no node  $V_i$ ,  $i \in \{2, \dots, k-1\}$  can be a collider on either  $p_1$  or  $p_2$ .

(i) Suppose first that  $p$  itself is unshielded. That is, no edge  $\langle V_i, V_{i+2} \rangle$ ,  $i \in \{0, k-2\}$  is in  $\mathcal{G}$ . Of course, since  $\mathcal{G}_2$  contains edge  $A_1 \leftarrow V_1$ ,  $p_2$  is of the form  $A_1 \leftarrow V_1 \dots Y_1$ . Hence, we only need to show  $p_1$  is a causal path in  $\mathcal{G}_2$ .

Since  $p$  is unshielded,  $p_1$  is also an unshielded path. Since  $A_1 \rightarrow V_1$  is in  $\mathcal{G}_1$ , as a consequence of iterative application of rule R1 of Meek (1995) (Fig. 3),  $p_1$  is a causal path in  $\mathcal{G}_1$ .

(ii) Next, we suppose that  $p$  is shielded. We first show that  $A_1 \rightarrow V_i$ , for all  $i \in \{2, \dots, r\}$ ,  $r \leq k$  is in  $\mathcal{G}$ .

As discussed at the beginning of this proof,  $p(V_1, Y_1)$  is unshielded. Therefore, since  $p$  is shielded and  $p(V_1, Y_1)$  is unshielded, edge  $\langle A_1, V_2 \rangle$  is in  $\mathcal{G}$ . Furthermore, since  $p$  is chosen as a shortest proper possibly causal path from  $A$  to  $Y$  that starts with an undirected edge in  $\mathcal{G}$ ,  $\langle A_1, V_2 \rangle$  must be of the form  $A_1 \rightarrow V_2$ .

If path  $\langle A_1, V_2 \rangle \oplus p(V_2, Y_1)$  is shielded, then by the same reasoning as above,  $A_1 \rightarrow V_3$  is in  $\mathcal{G}$ . We can continue with the same reasoning, until we reach  $V_r$ ,  $r \in \{2, \dots, k\}$ , so that  $A_1 \rightarrow V_i$  is in  $\mathcal{G}$  for  $i \in \{2, \dots, r\}$  and  $\langle A_1, V_r \rangle \oplus p(V_r, Y_1)$  is an unshielded possibly causal path.

We note that if  $r < k$ ,  $p(V_r, Y_1)$  is of the form  $V_r \rightarrow \dots \rightarrow Y_1$ . This is due to the fact that  $A_1 \rightarrow V_r$  is in  $\mathcal{G}$  and that  $\langle A_1, V_r \rangle \oplus p(V_r, Y_1)$  is an unshielded possibly causal path in  $\mathcal{G}$ .

Next, we show that  $p_2$  is of the form  $A_1 \leftarrow V_1 \rightarrow \dots \rightarrow Y_1$ . Since  $A_1 \leftarrow V_1$  and  $A_1 \rightarrow V_2$  are in  $\mathcal{G}_2$  and since  $\mathcal{G}_2$  is acyclic, by rule R2 of Meek (1995), the edge  $\langle V_1, V_2 \rangle$  is of the form  $V_1 \rightarrow V_2$  in  $\mathcal{G}_2$ . Then since  $p_2(V_1, Y_1)$  is an unshielded possibly causal path that starts with  $V_1 \rightarrow V_2$ , by iterative applications of rule R1 of Meek (1995),  $p_2(V_1, Y_1)$  must be a causal path in  $\mathcal{G}_2$ .

Suppose  $\mathcal{D}_1$  is a DAG in  $[\mathcal{G}_1]$ . From the above, we know that  $A_1 \rightarrow V_1$  and if  $r < k$ ,  $V_r \rightarrow \dots \rightarrow Y_1$  are in  $\mathcal{G}_1$  and therefore in  $\mathcal{D}_1$  as well. The subpath  $p(V_1, V_r)$  is a possibly causal unshielded path in  $\mathcal{G}$  and hence, no node among  $V_2, \dots, V_{r-1}$  is a collider on  $p$ ,  $p_1$ , or  $p_{11}$ . It then follows that either  $p_{11}(V_1, V_r)$  is a causal path in  $\mathcal{D}_{11}$ , in which case  $p_{11}$  is of the form  $A_1 \rightarrow V_1 \rightarrow \dots \rightarrow Y_1$ , or there is a node  $V_l$ ,  $1 < l \leq r$  on  $p_{11}(V_1, V_r)$ , such that  $p_{11}(V_1, V_r)$  is of the form  $V_1 \leftarrow \dots \leftarrow V_l \rightarrow \dots \rightarrow V_r$ .  $\square$

## References

- Lauritzen, S. L., Dawid, A. P., Larsen, B. N., and Leimer, H.-G. (1990). Independence properties of directed Markov fields. *Networks*, 20(5):491–505.
- Mardia, K. V., Kent, J. T., and Bibby, J. M. (1980). *Multivariate Analysis (Probability and Mathematical Statistics)*. Academic Press London.
- Meek, C. (1995). Causal inference and causal explanation with background knowledge. In *Proceedings of the 11th Annual Conference on Uncertainty in Artificial Intelligence (UAI-95)*, pages 403–410.
- Pearl, J. (2009). *Causality*. Cambridge University Press, Cambridge, 2nd edition.
- Perković, E. (2020). Identifying causal effects in maximally oriented partially directed acyclic graphs. In *Proceedings of the 36th Annual Conference on Uncertainty in Artificial Intelligence (UAI-20)*.
- Perković, E., Kalisch, M., and Maathuis, M. H. (2017). Interpreting and using CPDAGs with background knowledge. In *Proceedings of the 33rd Annual Conference on Uncertainty in Artificial Intelligence (UAI-17)*.
- Perković, E., Textor, J., Kalisch, M., and Maathuis, M. H. (2018). Complete graphical characterization and construction of adjustment sets in Markov equivalence classes of ancestral graphs. *Journal of Machine Learning Research*, 18(220):1–62.
- Shpitser, I. and Pearl, J. (2006). Identification of joint interventional distributions in recursive semi-Markovian causal models. In *Proceedings of AAAI 2006*, pages 1219–1226.
- Wright, S. (1921). Correlation and causation. *Journal of Agricultural Research*, 20:557–585.
